# Supplementary material for: New Insights Into the Virus-to-Prokaryote Ratio (VPR) in Marine Sediments
Source: PubMed Central journal article supplement (PMC7272709; doi:10.3389/fmicb.2020.01102), 2020-05-29
Supplement: Image_1.pdf [file Image_1.pdf]

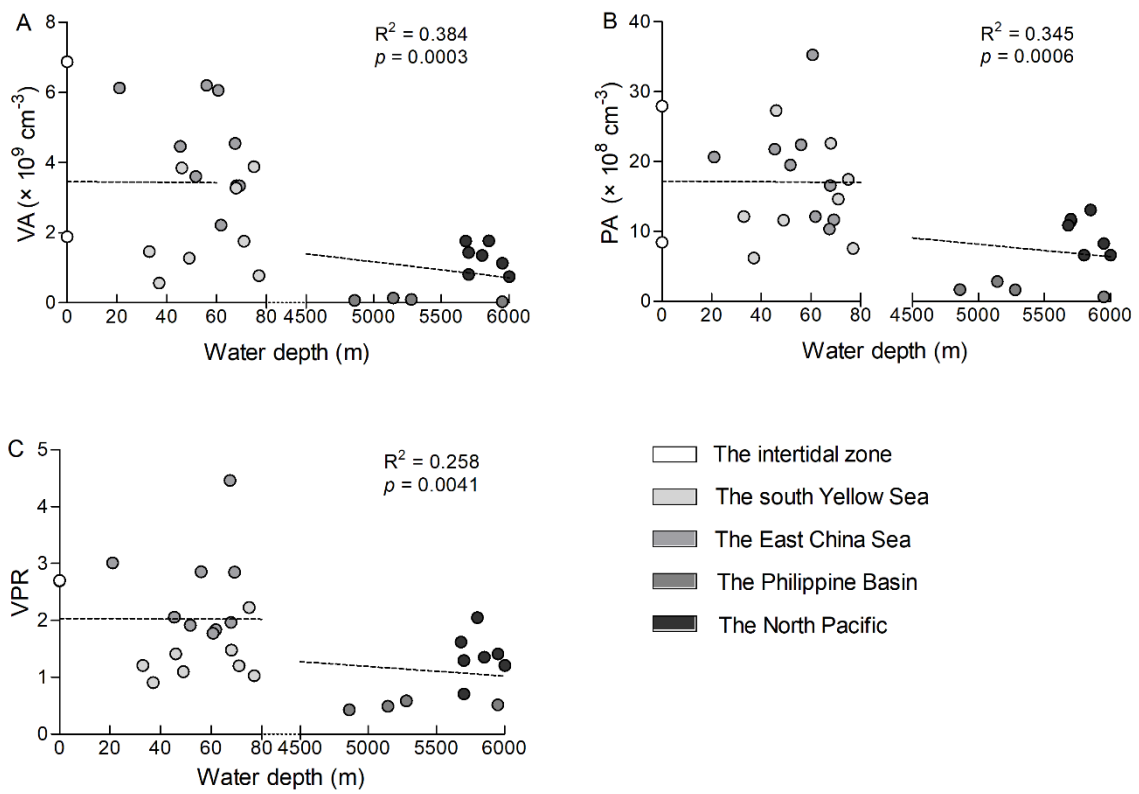

Figure S1. Spatial patterns of sediment (A) VA, (B) PA and (C) VPR along with the water depth gradient in the surveyed areas.
